# Supplementary material for: Creative computing with Landlab: an open-source toolkit for building, coupling, and exploring two-dimensional numerical models of Earth-surface dynamics
Source: Copernicus journal article supplement (doi:10.5194/esurf-2016-45), 2016-09-14
Supplement: Supplementary file 1 [file esurf-2016-45-supplement.pdf]

**Supplementary information for “Creative computing with Landlab: an open-source toolkit for building, coupling, and exploring two-dimensional numerical models of earth-surface dynamics”,** by Daniel E. J. Hobbey, Jordan M. Adams, Sai Siddhartha Nudurupati, Eric W. H. Hutton, Nicole M. Gasparini, Erkan Istanbuluoglu, Gregory E. Tucker

This document contains:

***Table S1:*** A list of all Landlab standard names in Landlab v.1.0.

***Scripts S2-S6:*** Scripts to run the models described in section 5 of the main text. Note S5 also contains the text of a separate input file after the code block.

**Table S1. Field names used by Landlab version 1.0.**

| Field name                                      | Used by                                                                              | Provided by                              |
|-------------------------------------------------|--------------------------------------------------------------------------------------|------------------------------------------|
| channel_bed_shear_stress                        |                                                                                      | SedDepEroder                             |
| channel_chi_index                               |                                                                                      | ChiFinder                                |
| channel_depth                                   |                                                                                      | SedDepEroder                             |
| channel_discharge                               |                                                                                      | SedDepEroder                             |
| channel_steepness_index                         |                                                                                      | SteepnessFinder                          |
| channel_width                                   |                                                                                      | SedDepEroder                             |
| channel_sediment_relative_flux                  |                                                                                      | SedDepEroder                             |
| channel_sediment_volumetric_flux                |                                                                                      | SedDepEroder                             |
| channel_sediment_volumetric_transport_capacity  |                                                                                      | SedDepEroder                             |
| depression_depth                                | DepressionFinderAndRouter                                                            |                                          |
| depression_outlet_node                          | DepressionFinderAndRouter                                                            |                                          |
| drainage_area                                   | ChiFinder<br>FastscapeEroder<br>SedDepEroder<br>SteepnessFinder<br>StreamPowerEroder | FlowRouter                               |
| flow_link_to_receiver_node                      | ChiFinder<br>FastscapeEroder<br>SedDepEroder<br>SteepnessFinder<br>StreamPowerEroder | FlowRouter                               |
| flow_receiver_node                              | ChiFinder<br>FastscapeEroder<br>SedDepEroder<br>SteepnessFinder<br>StreamPowerEroder | FlowRouter                               |
| flow_sink_flag                                  |                                                                                      | FlowRouter                               |
| flow_upstream_node_order                        | ChiFinder<br>FastscapeEroder<br>SedDepEroder<br>SteepnessFinder<br>StreamPowerEroder | FlowRouter                               |
| lithosphere_overlying_pressure_increment        | Flexure                                                                              |                                          |
| lithosphere_surface_elevation_increment         |                                                                                      | Flexure<br>gFlex                         |
| plant_age                                       |                                                                                      | VegCA                                    |
| plant_live_index                                |                                                                                      | VegCA                                    |
| radiation_incoming_shortwave_flux               |                                                                                      | PotentialEvapotranspiration<br>Radiation |
| radiation_net_flux                              |                                                                                      | PotentialEvapotranspiration              |
| radiation_net_longwave_flux                     |                                                                                      | PotentialEvapotranspiration              |
| radiation_net_shortwave_flux                    |                                                                                      | PotentialEvapotranspiration<br>Radiation |
| radiation_ratio_to_flat_surface                 | PotentialEvapotranspiration                                                          | Radiation                                |
| rainfall_daily_depth                            | SoilMoisture                                                                         |                                          |
| sediment_fill_depth                             |                                                                                      | SinkFiller                               |
| soil_moisture_initial_saturation_fraction       | SoilMoisture                                                                         |                                          |
| soil_moisture_root_zone_leakage                 |                                                                                      | SoilMoisture                             |
| soil_moisture_saturation_fraction               |                                                                                      | SoilMoisture                             |
| soil_water_infiltration_depth                   | SoilInfiltrationGreenAmpt                                                            | SoilInfiltrationGreenAmpt                |
| surface_evapotranspiration                      | Vegetation                                                                           | SoilMoisture                             |
| surface_potential_evapotranspiration_30day_mean | Vegetation                                                                           |                                          |
| surface_potential_evapotranspiration_rate       | SoilMoisture<br>Vegetation                                                           | PotentialEvapotranspiration              |
| surface_runoff                                  |                                                                                      | SoilMoisture                             |

(continues)

(continued)

| Field name                          | Used by                                                                                                                                                                                                                                                                              | Provided by                                                                                                                              |
|-------------------------------------|--------------------------------------------------------------------------------------------------------------------------------------------------------------------------------------------------------------------------------------------------------------------------------------|------------------------------------------------------------------------------------------------------------------------------------------|
| surface_load_stress                 | gFlex                                                                                                                                                                                                                                                                                |                                                                                                                                          |
| surface_water_depth                 | KinematicWaveRengers<br>OverlandFlow<br>OverlandFlowBates<br>SoilInfiltrationGreenAmpt                                                                                                                                                                                               | KinematicWaveRengers<br>OverlandFlow<br>OverlandFlowBates<br>SoilInfiltrationGreenAmpt                                                   |
| surface_water_discharge             | DetachmentLtdErosion                                                                                                                                                                                                                                                                 | FlowRouter<br>KinematicWaveRengers<br>OverlandFlow<br>OverlandFlowBates                                                                  |
| surface_water_velocity              |                                                                                                                                                                                                                                                                                      | KinematicWaveRengers                                                                                                                     |
| topographic_elevation               | ChiFinder<br>DepressionFinderAndRouter<br>DetachmentLtdErosion<br>FastscapeEroder<br>FlowRouter<br>KinematicWaveRengers<br>LinearDiffuser<br>OverlandFlow<br>OverlandFlowBates<br>PerronNLDiffuse<br>Radiation<br>SedDepEroder<br>SinkFiller<br>SteepnessFinder<br>StreamPowerEroder | DetachmentLtdErosion<br>FastscapeEroder<br>gFlex<br>LinearDiffuser<br>PerronNLDiffuse<br>SedDepEroder<br>SinkFiller<br>StreamPowerEroder |
| topographic_gradient                |                                                                                                                                                                                                                                                                                      | LinearDiffuser                                                                                                                           |
| topographic_slope                   | DetachmentLtdErosion                                                                                                                                                                                                                                                                 |                                                                                                                                          |
| topographic_steepest_slope          | ChiFinder<br>SedDepEroder<br>SteepnessFinder<br>StreamPowerEroder                                                                                                                                                                                                                    | FlowRouter                                                                                                                               |
| hillslope_sediment_unit_volume_flux |                                                                                                                                                                                                                                                                                      | LinearDiffuser                                                                                                                           |
| vegetation_cover_fraction           | SoilMoisture                                                                                                                                                                                                                                                                         |                                                                                                                                          |
| vegetation_cumulative_water_stress  | VegCA                                                                                                                                                                                                                                                                                | Vegetation                                                                                                                               |
| vegetation_dead_biomass             |                                                                                                                                                                                                                                                                                      | Vegetation                                                                                                                               |
| vegetation_dead_leaf_area_index     |                                                                                                                                                                                                                                                                                      | Vegetation                                                                                                                               |
| vegetation_live_biomass             |                                                                                                                                                                                                                                                                                      | Vegetation                                                                                                                               |
| vegetation_live_leaf_area_index     | SoilMoisture                                                                                                                                                                                                                                                                         | Vegetation                                                                                                                               |
| vegetation_plant_functional_type    | SoilMoisture<br>VegCA<br>Vegetation                                                                                                                                                                                                                                                  |                                                                                                                                          |
| vegetation_water_stress             | Vegetation                                                                                                                                                                                                                                                                           | SoilMoisture                                                                                                                             |
| water_unit_flux_in                  | FlowRouter                                                                                                                                                                                                                                                                           |                                                                                                                                          |
| water_surface_gradient              |                                                                                                                                                                                                                                                                                      | OverlandFlow<br>OverlandFlowBates                                                                                                        |

## Script S2. Code to examine run times of simple stream power models on two Landlab grid types (Fig. 11).

```
1 import numpy as np
2 from matplotlib.pyplot import figure, show, plot, xlabel, ylabel, ylim
3 from landlab import RasterModelGrid, HexModelGrid
4 from landlab.components import StreamPowerEroder, FlowRouter, \
5     PrecipitationDistribution
6 from landlab import imshow_grid
7 from time import time
8
9 uplift_rate = 0.001
10 side_list = [5, 10, 15, 20, 30, 40, 50, 75, 100, 150]
11 total_time_listr = []
12 total_time_listh = []
13 loop_time_listr = []
14 loop_time_listh = []
15 num_repeats = 5
16
17 for side in side_list:
18     print(side)
19     for i in range(2):
20         temp_tottime = []
21         temp_looptime = []
22         for j in range(num_repeats):
23             time_0 = time()
24             if i == 0:
25                 mg = RasterModelGrid((side, side), 100.)
26             else:
27                 mg = HexModelGrid(side, side, 100., shape='rect')
28
29             mg_noise = np.random.rand(mg.number_of_nodes)/1000.
30
31             zr = mg.add_zeros('node', 'topographic__elevation')
32             zr += mg_noise
33             Qr = mg.add_empty('node', 'surface_water__discharge')
34
35             runoff_rater = mg.add_ones('node', 'water__unit_flux_in')
36
37             frr = FlowRouter(mg)
38             # ^water__unit_flux_in gets automatically ingested
39             spr = StreamPowerEroder(mg, K_sp=1.e-5, threshold_sp=1.e-6,
40                                     use_Q='surface_water__discharge')
41             precip = PrecipitationDistribution(
42                 mean_storm_depth=5000., mean_storm_duration=100.,
43                 mean_interstorm_duration=900., total_t=3.e6)
44
45             time_in = time()
46             for (dt, runoff) in \
47                 precip.yield_storm_interstorm_duration_intensity():
48                 zr[mg.core_nodes] += uplift_rate*dt
49                 if runoff > 0.:
50                     runoff_rater.fill(runoff)
51                     frr.run_one_step()
52                     spr.run_one_step(dt)
```

```

53         # raincount += 1
54         # print(raincount, dt, runoff)
55         time_out = time()
56         temp_tottime.append(time_out-time_0)
57         temp_looptime.append(time_out-time_in)
58         tottime = np.mean(temp_tottime)
59         looptime = np.mean(temp_looptime)
60         if i == 0:
61             loop_time_listr.append(looptime)
62             total_time_listr.append(tottime)
63         else:
64             loop_time_listh.append(looptime)
65             total_time_listh.append(tottime)
66
67     np.savetxt('side_list', np.array(side_list))
68     np.savetxt('loop_time_listr', np.array(loop_time_listr))
69     np.savetxt('total_time_listr', np.array(total_time_listr))
70     np.savetxt('loop_time_listh', np.array(loop_time_listh))
71     np.savetxt('total_time_listh', np.array(total_time_listh))
72
73     side_list = np.loadtxt('side_list')
74     loop_time_listr = np.loadtxt('loop_time_listr')
75     total_time_listr = np.loadtxt('total_time_listr')
76     loop_time_listh = np.loadtxt('loop_time_listh')
77     total_time_listh = np.loadtxt('total_time_listh')
78     s = 12.
79     figure('runtimes')
80     plot(np.array(side_list)**2, loop_time_listr, 'b+', markersize=s)
81     plot(np.array(side_list)**2, total_time_listr, 'D',
82          markerfacecolor='none', markeredgcolor='b', markersize=s)
83     plot(np.array(side_list)**2, loop_time_listh, 'rx', markersize=s)
84     plot(np.array(side_list)**2, total_time_listh, 's',
85          markerfacecolor='none', markeredgcolor='r', markersize=s)
86     xlabel('Number of nodes')
87     ylabel('Time (s)')
88
89     figure('overhead')
90     overhead_r = np.array(total_time_listr) - np.array(loop_time_listr)
91     overhead_h = np.array(total_time_listh) - np.array(loop_time_listh)
92     plot(np.array(side_list)**2, overhead_r, 'bo', markersize=s)
93     plot(np.array(side_list)**2, overhead_h, 'r^', markersize=s)
94     ylim([0, 2.1])
95     xlabel('Number of nodes')
96     ylabel('Time (s)')
97
98     show()

```

### Script S3. Code to run a simple stream power model in Landlab, incorporating both storms and a threshold, on two different grid types (Fig. 12).

```
1 import numpy as np
2 from matplotlib.pyplot import figure, show, loglog, xlim, ylim, xlabel, ylabel
3 from landlab import RasterModelGrid, HexModelGrid
4 from landlab.components import StreamPowerEroder, FlowRouter, \
5     PrecipitationDistribution
6 from landlab import imshow_grid
7 from copy import deepcopy
8
9 # This script is to make fig 11
10 side = 100
11 uplift_rate = 0.001
12 gridlist = []
13
14 for i in range(2):
15     if i == 0:
16         mg = RasterModelGrid((side, side), 100.)
17     else:
18         mg = HexModelGrid(side, side, 100., shape='rect')
19
20     # add initial noise to produce convergent flow from the initial conditions
21     np.random.seed(0) # so our figures are reproducible
22     mg_noise = np.random.rand(mg.number_of_nodes)/1000.
23
24     # set up the input fields
25     zr = mg.add_zeros('node', 'topographic__elevation')
26     zr += mg_noise
27     Qr = mg.add_empty('node', 'surface_water__discharge')
28     runoff_rater = mg.add_ones('node', 'water__unit_flux_in')
29
30     # Landlab sets fixed elevation boundary conditions by default. This is
31     # what we want, so we will not modify these here.
32
33     # instantiate the components:
34     frr = FlowRouter(mg) # water__unit_flux_in gets automatically ingested
35     spr = StreamPowerEroder(
36         mg, K_sp=1.e-5, m_sp=0.5, n_sp=1., threshold_sp=1.e-6,
37         use_Q='surface_water__discharge')
38     # the `use_Q` flag tells the StreamPowerEroder to use discharge defined in
39     # the field 'surface_water__discharge' as the first term in the stream
40     # power law, not the drainage area, as is sometimes also seen.
41     precip = PrecipitationDistribution(
42         mean_storm_depth=5000., mean_storm_duration=100.,
43         mean_interstorm_duration=900., total_t=3.e6)
44
45     raincount = 0 # this flag lets us see how many rain events have occurred
46     for (dt, runoff) in precip.yield_storm_interstorm_duration_intensity():
47         zr[mg.core_nodes] += uplift_rate*dt
48         if runoff > 0.:
49             runoff_rater.fill(runoff)
50             frr.run_one_step()
51             spr.run_one_step(dt)
52             raincount += 1
```

```

53         print(raincount, dt, runoff)
54         # this loop will terminate automatically, thanks to the generator
55         # method we're calling from the `precip` class object.
56
57     # Do some plotting. First the topography:
58     figure('topo ' + str(i))
59     imshow_grid(mg, zr, grid_units=('m', 'm'), var_name='Elevation (m)')
60
61     # then some slope-area plots, for checking:
62     figure('S-A_all')
63     loglog(mg.at_node['drainage_area'],
64            mg.at_node['topographic_steepest_slope'], 'x')
65     figure('S-A_interior_only ' + str(i))
66     edge = np.unique(mg.neighbors_at_node[mg.boundary_nodes, :])
67     not_edge = np.in1d(mg.nodes.flatten(), edge, assume_unique=True,
68                       invert=True)
69     loglog(mg.at_node['drainage_area'][not_edge],
70            mg.at_node['topographic_steepest_slope'][not_edge], 'x')
71     xlim([1.e3, 1.e8])
72     xlabel('Topographic slope')
73     ylabel('Drainage area (m^2)')
74
75     # save the data to a list so we can inspect both grid types at our leisure
76     # if this script is run from an interactive Python environment like
77     # iPython:
78     gridlist.append(deepcopy(mg))
79
80 # show all the plots we have:
81 show()
82
83 # just to produce the figures:
84 i = 0
85 for mg in gridlist:
86     figure('topo ' + str(i))
87     imshow_grid(mg, 'topographic_elevation', grid_units=('m', 'm'),
88                var_name='Elevation (m)')
89     figure('S-A ' + str(i))
90     edge = np.unique(mg.neighbors_at_node[mg.boundary_nodes, :])
91     not_edge = np.in1d(mg.nodes.flatten(), edge, assume_unique=True,
92                       invert=True)
93     loglog(mg.at_node['drainage_area'][not_edge],
94            mg.at_node['topographic_steepest_slope'][not_edge], 'x')
95     xlim([1.e3, 1.e7])
96     ylabel('Topographic slope')
97     xlabel('Drainage area (m^2)')
98     figure('S-A')
99     loglog(mg.at_node['drainage_area'][not_edge],
100            mg.at_node['topographic_steepest_slope'][not_edge], 'x')
101     xlim([1.e3, 1.e7])
102     ylabel('Topographic slope')
103     xlabel('Drainage area (m^2)')
104     i += 1
105 show()
106

```

## Script S4. Code to run a coupled stream power-hillslope diffusion model in Landlab on two different grid types (Fig. 12).

```
1 import numpy as np
2 from matplotlib.pyplot import figure, show, loglog, xlim, ylim, xlabel, ylabel
3 from landlab import RasterModelGrid, HexModelGrid
4 from landlab.components import StreamPowerEroder, FlowRouter, \
5     PrecipitationDistribution, LinearDiffuser, DepressionFinderAndRouter
6 from landlab import imshow_grid
7 from copy import deepcopy
8
9 side = 100
10 uplift_rate = 0.001
11 gridlist = []
12
13 for i in range(2):
14     if i == 0:
15         mg = RasterModelGrid((side, side), 100.)
16     else:
17         mg = HexModelGrid(side, side, 100., shape='rect')
18
19     # add initial noise to produce convergent flow from the initial conditions
20     np.random.seed(0) # so our figures are reproducible
21     mg_noise = np.random.rand(mg.number_of_nodes)/1000.
22
23     # set up the input fields
24     zr = mg.add_zeros('node', 'topographic__elevation')
25     zr += mg_noise
26     Qr = mg.add_empty('node', 'surface_water__discharge')
27     runoff_rater = mg.add_ones('node', 'water__unit_flux_in')
28
29     # Landlab sets fixed elevation boundary conditions by default. This is
30     # what we want, so we will not modify these here.
31
32     # instantiate the components:
33     frr = FlowRouter(mg) # water__unit_flux_in gets automatically ingested
34     spr = StreamPowerEroder(
35         mg, K_sp=1.e-5, m_sp=0.5, n_sp=1., threshold_sp=1.e-6,
36         use_Q='surface_water__discharge')
37     # the `use_Q` flag tells the StreamPowerEroder to use discharge defined in
38     # the field 'surface_water__discharge' as the first term in the stream
39     # power law, not the drainage area, as is sometimes also seen.
40     dfn = LinearDiffuser(mg, linear_diffusivity=0.05)
41     lake = DepressionFinderAndRouter(mg)
42     precip = PrecipitationDistribution(
43         mean_storm_depth=5000., mean_storm_duration=100.,
44         mean_interstorm_duration=900., total_t=3.e6)
45
46     raincount = 0 # this flag lets us see how many rain events have occurred
47     for (dt, runoff) in precip.yield_storm_interstorm_duration_intensity():
48         zr[mg.core_nodes] += uplift_rate*dt
49         dfn.run_one_step(dt) # hillslopes always diffusive, even when dry
50         if runoff > 0.:
51             runoff_rater.fill(runoff)
52             frr.run_one_step()
```



```

53         lake.map_depressions()
54         spr.run_one_step(dt, flooded_nodes=lake.lake_at_node)
55         raincount += 1
56         print(raincount, dt, runoff)
57         # this loop will terminate automatically, thanks to the generator
58         # method we're calling from the `precip` class object.
59
60     # Do some plotting. First the topography:
61     figure('topo ' + str(i))
62     imshow_grid(mg, zr, grid_units=('m', 'm'), var_name='Elevation (m)')
63
64     # then some slope-area plots, for checking:
65     figure('S-A_all')
66     loglog(mg.at_node['drainage_area'],
67           mg.at_node['topographic_steepest_slope'], 'x')
68     figure('S-A_interior_only ' + str(i))
69     edge = np.unique(mg.neighbors_at_node[mg.boundary_nodes, :])
70     not_edge = np.in1d(mg.nodes.flatten(), edge, assume_unique=True,
71                       invert=True)
72     loglog(mg.at_node['drainage_area'][not_edge],
73           mg.at_node['topographic_steepest_slope'][not_edge], 'x')
74     xlim([1.e3, 1.e7])
75     xlabel('Topographic slope')
76     ylabel('Drainage area (m^2)')
77
78     # save the data to a list so we can inspect both grid types at our leisure
79     # if this script is run from an interactive Python environment like
80     # iPython:
81     gridlist.append(deepcopy(mg))
82
83     # show all the plots we have:
84     show()
85
86     # just to produce the figures:
87     i = 0
88     for mg in gridlist:
89         figure('topo ' + str(i))
90         imshow_grid(mg, 'topographic_elevation', grid_units=('m', 'm'),
91                   var_name='Elevation (m)')
92         figure('S-A ' + str(i))
93         edge = np.unique(mg.neighbors_at_node[mg.boundary_nodes, :])
94         not_edge = np.in1d(mg.nodes.flatten(), edge, assume_unique=True,
95                           invert=True)
96         loglog(mg.at_node['drainage_area'][not_edge],
97               mg.at_node['topographic_steepest_slope'][not_edge], 'x')
98         xlim([1.e3, 1.e7])
99         ylabel('Topographic slope')
100        xlabel('Drainage area (m^2)')
101        figure('S-A')
102        loglog(mg.at_node['drainage_area'][not_edge],
103              mg.at_node['topographic_steepest_slope'][not_edge], 'x')
104        xlim([1.e3, 1.e7])
105        ylabel('Topographic slope')
106        xlabel('Drainage area (m^2)')
107        i += 1
108    show()

```

## Script S5. Code to run an ecohydrology model in Landlab.

```
1 # Authors: Sai Nudurupati & Erkan Istanbuluoglu, 21May15
2 # Edited: 15Jul16 - to conform to Landlab version 1.
3 # A companion interactive tutorial an be found at: landlab/tutorials/
4 # ...ecohydrology/cellular_automaton_vegetation_flat_surface.ipynb
5
6 import os
7 import time
8 import numpy as np
9 import matplotlib as mpl
10 import matplotlib.pyplot as plt
11
12 from landlab import load_params, RasterModelGrid
13 from landlab.plot import imshow_grid
14 from landlab.components import (PrecipitationDistribution, Radiation,
15                                 PotentialEvapotranspiration, SoilMoisture,
16                                 Vegetation, VegCA)
17
18 GRASS = 0
19 SHRUB = 1
20 TREE = 2
21 BARE = 3
22 SHRUBSEEDLING = 4
23 TREESEEDLING = 5
24
25
26 def compose_veg_grid(grid, percent_bare=0.4, percent_grass=0.2,
27                     percent_shrub=0.2, percent_tree=0.2):
28     """Compose spatially distribute PFT."""
29     no_cells = grid.number_of_cells
30     shrub_point = int(percent_bare * no_cells)
31     tree_point = int((percent_bare + percent_shrub) * no_cells)
32     grass_point = int((1 - percent_grass) * no_cells)
33
34     veg_grid = np.full(grid.number_of_cells, BARE, dtype=int)
35     veg_grid[shrub_point:tree_point] = SHRUB
36     veg_grid[tree_point:grass_point] = TREE
37     veg_grid[grass_point:] = GRASS
38
39     np.random.shuffle(veg_grid)
40     return veg_grid
41
42
43 def initialize(data, grid, grid1):
44     """Initialize random plant type field.
45
46     Plant types are defined as the following:
47
48     * GRASS = 0
49     * SHRUB = 1
50     * TREE = 2
51     * BARE = 3
52     * SHRUBSEEDLING = 4
53     * TREESEEDLING = 5
54     """
```

```

55     grid1.at_cell['vegetation__plant_functional_type'] = compose_veg_grid(
56         grid1, percent_bare=data['percent_bare_initial'],
57         percent_grass=data['percent_grass_initial'],
58         percent_shrub=data['percent_shrub_initial'],
59         percent_tree=data['percent_tree_initial'])
60
61     # Assign plant type for representative ecohydrologic simulations
62     grid.at_cell['vegetation__plant_functional_type'] = np.arange(6)
63     grid1.at_node['topographic__elevation'] = np.full(grid1.number_of_nodes,
64                                                     1700.)
65     grid.at_node['topographic__elevation'] = np.full(grid.number_of_nodes,
66                                                     1700.)
67     precip_dry = PrecipitationDistribution(
68         mean_storm_duration=data['mean_storm_dry'],
69         mean_interstorm_duration=data['mean_interstorm_dry'],
70         mean_storm_depth=data['mean_storm_depth_dry'])
71     precip_wet = PrecipitationDistribution(
72         mean_storm_duration=data['mean_storm_wet'],
73         mean_interstorm_duration=data['mean_interstorm_wet'],
74         mean_storm_depth=data['mean_storm_depth_wet'])
75
76     radiation = Radiation(grid)
77     pet_tree = PotentialEvapotranspiration(grid, method=data['PET_method'],
78                                           MeanTmaxF=data['MeanTmaxF_tree'],
79                                           delta_d=data['DeltaD'])
80     pet_shrub = PotentialEvapotranspiration(grid, method=data['PET_method'],
81                                           MeanTmaxF=data['MeanTmaxF_shrub'],
82                                           delta_d=data['DeltaD'])
83     pet_grass = PotentialEvapotranspiration(grid, method=data['PET_method'],
84                                           MeanTmaxF=data['MeanTmaxF_grass'],
85                                           delta_d=data['DeltaD'])
86     soil_moisture = SoilMoisture(grid, **data) # Soil Moisture object
87     vegetation = Vegetation(grid, **data) # Vegetation object
88     vegca = VegCA(grid1, **data) # Cellular automaton object
89
90     # Initializing inputs for Soil Moisture object
91     grid.at_cell['vegetation__live_leaf_area_index'] = (
92         1.6 * np.ones(grid.number_of_cells))
93     grid.at_cell['soil_moisture__initial_saturation_fraction'] = (
94         0.59 * np.ones(grid.number_of_cells))
95
96     return (precip_dry, precip_wet, radiation, pet_tree, pet_shrub,
97           pet_grass, soil_moisture, vegetation, vegca)
98
99
100 def empty_arrays(n, grid, grid1):
101     precip = np.empty(n) # Record precipitation
102     inter_storm_dt = np.empty(n) # Record inter storm duration
103     storm_dt = np.empty(n) # Record storm duration
104     time_elapsed = np.empty(n) # To record time elapsed from start of simulation
105
106     # Cumulative Water Stress
107     veg_type = np.empty([n / 55, grid1.number_of_cells], dtype=int)
108     daily_pet = np.zeros([365, grid.number_of_cells])
109     rad_factor = np.empty([365, grid.number_of_cells])
110     EP30 = np.empty([365, grid.number_of_cells])

```

```

111
112     # 30 day average PET to determine season
113     pet_threshold = 0 # Initializing pet_threshold to ETThresholddown
114     return (precip, inter_storm_dt, storm_dt, time_elapsed, veg_type,
115           daily_pet, rad_factor, EP30, pet_threshold)
116
117
118     def create_pet_lookup(radiation, pet_tree, pet_shrub, pet_grass, daily_pet,
119                          rad_factor, EP30, grid):
120         for i in range(0, 365):
121             pet_tree.update(float(i) / 365.25)
122             pet_shrub.update(float(i) / 365.25)
123             pet_grass.update(float(i) / 365.25)
124             daily_pet[i] = [pet_grass._PET_value, pet_shrub._PET_value,
125                             pet_tree._PET_value, 0., pet_shrub._PET_value,
126                             pet_tree._PET_value]
127             radiation.update(float(i) / 365.25)
128             rad_factor[i] = grid.at_cell['radiation__ratio_to_flat_surface']
129
130             if i < 30:
131                 if i == 0:
132                     EP30[0] = daily_pet[0]
133                 else:
134                     EP30[i] = np.mean(daily_pet[:i], axis=0)
135             else:
136                 EP30[i] = np.mean(daily_pet[i - 30:i], axis=0)
137
138
139     def save(sim, inter_storm_dt, storm_dt, precip, veg_type, yrs,
140            walltime, time_elapsed):
141         np.save(sim + '_Tb', inter_storm_dt)
142         np.save(sim + '_Tr', storm_dt)
143         np.save(sim + '_P', precip)
144         np.save(sim + '_VegType', veg_type)
145         np.save(sim + '_Years', yrs)
146         np.save(sim + '_Time_Consumed_minutes', walltime)
147         np.save(sim + '_CurrentTime', time_elapsed)
148
149
150     def plot(sim, grid, veg_type, yrs, yr_step=10):
151         pic = 0
152         years = range(0, yrs)
153         cmap = mpl.colors.ListedColormap(
154             ['green', 'red', 'black', 'white', 'red', 'black'])
155         bounds = [-0.5, 0.5, 1.5, 2.5, 3.5, 4.5, 5.5]
156         norm = mpl.colors.BoundaryNorm(bounds, cmap.N)
157         print 'Plotting cellular field of Plant Functional Type'
158         print 'Green - Grass; Red - Shrubs; Black - Trees; White - Bare'
159
160         # Plot images to make gif.
161         for year in range(0, yrs, yr_step):
162             filename = 'year_' + "%05d" % year
163             pic += 1
164             plt.figure(pic, figsize=(10, 8))
165             imshow_grid(grid, veg_type[year], values_at='cell', cmap=cmap,
166                       grid_units=('m', 'm'), norm=norm, limits=[0, 5],

```

```

167         allow_colorbar=False)
168     plt.title(filename, weight='bold', fontsize=22)
169     plt.xlabel('X (m)', weight='bold', fontsize=18)
170     plt.ylabel('Y (m)', weight='bold', fontsize=18)
171     plt.xticks(fontsize=14, weight='bold')
172     plt.yticks(fontsize=14, weight='bold')
173     plt.savefig(sim + '_' + filename)
174
175     grass_cov = np.empty(yrs)
176     shrub_cov = np.empty(yrs)
177     tree_cov = np.empty(yrs)
178     grid_size = float(veg_type.shape[1])
179
180     for x in range(0, yrs):
181         grass_cov[x] = (veg_type[x][veg_type[x] == GRASS].size /
182                        grid_size) * 100
183         shrub_cov[x] = ((veg_type[x][veg_type[x] == SHRUB].size / grid_size) *
184                        100 + (veg_type[x][veg_type[x] == SHRUBSEEDLING].size /
185                               grid_size) * 100)
186         tree_cov[x] = ((veg_type[x][veg_type[x] == TREE].size / grid_size) *
187                        100 + (veg_type[x][veg_type[x] == TREESEEDLING].size /
188                               grid_size) * 100)
189
190     pic += 1
191     plt.figure(pic, figsize=(10, 8))
192     plt.plot(years, grass_cov, '-g', label='Grass', linewidth=4)
193     plt.hold(True)
194     plt.plot(years, shrub_cov, '-r', label='Shrub', linewidth=4)
195     plt.hold(True)
196     plt.plot(years, tree_cov, '-k', label='Tree', linewidth=4)
197     plt.ylabel('% Area Covered by Plant Type', weight='bold', fontsize=18)
198     plt.xlabel('Time in years', weight='bold', fontsize=18)
199     plt.xticks(fontsize=12, weight='bold')
200     plt.yticks(fontsize=12, weight='bold')
201     plt.legend(loc=0, prop={'size': 16, 'weight': 'bold'})
202     plt.savefig(sim + '_percent_cover')
203
204
205     # Now a script to drive the model:
206
207     grid1 = RasterModelGrid((100, 100), spacing=(5., 5.))
208     grid = RasterModelGrid((5, 4), spacing=(5., 5.))
209
210     # Create dictionary that holds the inputs
211     data = load_params('inputs_vegetation_ca.yaml')
212
213     (precip_dry, precip_wet, radiation, pet_tree, pet_shrub,
214      pet_grass, soil_moisture, vegetation, vegca) = initialize(data, grid, grid1)
215
216     n_years = 2000 # Approx number of years for model to run
217
218     # Calculate approximate number of storms per year
219     fraction_wet = (data['doy_end_of_monsoon'] -
220                   data['doy_start_of_monsoon']) / 365.
221     fraction_dry = 1 - fraction_wet
222     no_of_storms_wet = 8760 * fraction_wet / (data['mean_interstorm_wet'] +

```

```

223             data['mean_storm_wet'])
224 no_of_storms_dry = 8760 * fraction_dry / (data['mean_interstorm_dry'] +
225             data['mean_storm_dry'])
226 n = int(n_years * (no_of_storms_wet + no_of_storms_dry))
227
228 (precip, inter_storm_dt, storm_dt, time_elapsed, veg_type, daily_pet,
229  rad_factor, EP30, pet_threshold) = empty_arrays(n, grid, grid1)
230
231 create_pet_lookup(radiation, pet_tree, pet_shrub, pet_grass, daily_pet,
232  rad_factor, EP30, grid)
233
234 # Represent current time in years
235 current_time = 0 # Start from first day of Jan
236
237 # Keep track of run time for simulation - optional
238 wallclock_start = time.clock() # Recording time taken for simulation
239
240 # declaring few variables that will be used in the storm loop
241 time_check = 0. # Buffer to store current_time at previous storm
242 yrs = 0 # Keep track of number of years passed
243 water_stress = 0. # Buffer for Water Stress
244 Tg = 270 # Growing season in days
245
246 # Run storm Loop
247 for i in range(n):
248     # Update objects
249
250     # Calculate Day of Year (DOY)
251     julian = np.int(np.floor((current_time - np.floor(current_time)) * 365.))
252
253     # Generate seasonal storms
254     # Wet Season - Jul to Sep - NA Monsoon
255     if data['doy__start_of_monsoon'] <= julian <= data['doy__end_of_monsoon']:
256         precip_wet.update()
257         precip[i] = precip_wet.storm_depth
258         storm_dt[i] = precip_wet.storm_duration
259         inter_storm_dt[i] = precip_wet.interstorm_duration
260     else: # for Dry season
261         precip_dry.update()
262         precip[i] = precip_dry.storm_depth
263         storm_dt[i] = precip_dry.storm_duration
264         inter_storm_dt[i] = precip_dry.interstorm_duration
265
266     # Spatially distribute PET and its 30-day-mean (analogous to degree day)
267     grid.at_cell[
268         'surface__potential_evapotranspiration_rate'] = daily_pet[julian]
269     grid.at_cell[
270         'surface__potential_evapotranspiration_30day_mean'] = EP30[julian]
271
272     # Assign spatial rainfall data
273     grid.at_cell[
274         'rainfall__daily_depth'] = np.full(grid.number_of_cells, precip[i])
275
276     # Update soil moisture component
277     current_time = soil_moisture.update(current_time, Tr=storm_dt[i],
278         Tb=inter_storm_dt[i])

```

```

279
280     # Decide whether its growing season or not
281     if julian != 364:
282         if EP30[julian + 1, 0] > EP30[julian, 0]:
283             pet_threshold = 1
284             # 1 corresponds to ETThresholdup (begin growing season)
285         else:
286             pet_threshold = 0
287             # 0 corresponds to ETThresholddown (end growing season)
288
289     # Update vegetation component
290     vegetation.update(PETThreshold_switch=pet_threshold, Tb=inter_storm_dt[i],
291                     Tr=storm_dt[i])
292
293     # Update yearly cumulative water stress data
294     water_stress += (grid1.at_cell['vegetation_water_stress'] *
295                    inter_storm_dt[i] / 24.)
296
297     # Record time (optional)
298     time_elapsed[i] = current_time
299
300     # Update spatial PFTs with Cellular Automata rules
301     if (current_time - time_check) >= 1.:
302         if yrs % 100 == 0:
303             print 'Elapsed time = ', yrs, ' years'
304             veg_type[yrs] = grid1.at_cell['vegetation_plant_functional_type']
305             WS_ = np.choose(veg_type[yrs], water_stress)
306             grid1.at_cell['vegetation_cumulative_water_stress'] = WS_ / Tg
307             vegca.update()
308             time_check = current_time
309             water_stress = 0
310             yrs += 1
311
312     veg_type[yrs] = grid1.at_cell['vegetation_plant_functional_type']
313
314     wallclock_stop = time.clock()
315     walltime = (wallclock_stop - wallclock_start) / 60. # in minutes
316     print 'Time_consumed = ', walltime, ' minutes'
317
318     # Saving
319     try:
320         os.mkdir('output')
321     except OSError:
322         pass
323     finally:
324         os.chdir('output')
325
326     save('veg', inter_storm_dt, storm_dt, precip, veg_type, yrs,
327         walltime, time_elapsed)
328
329     plot('veg', grid1, veg_type, yrs, yr_step=100)

```

This code makes use of the following input text file, named  
"inputs\_vegetation\_ca.yaml":

```
### All inputs for Vegetation Cellular Automaton Model built on The Landlab
### can be given here.
### 14Feb2015 - Sai Nudurupati & Erkan Istanbuluoglu
### 15Jul2016 - Updated to comply with Landlab Version 1 naming conventions.

### Vegetation Cellular Automaton Model Input File:

n_short: 6600 # Number of storms for short simulation that plots hydrologic
parameters
n_long_DEM: 1320 # Number of storms for long simulation that operates on single
grid for sloped surface
n_long_flat: 660000 # Number of storms for long simulation that operates on two
grids - flat surface

## Initial Plant Functional Types (PFT) distribution
percent_bare_initial: 0.7 # Initial percentage of cells occupied by bare soil
percent_grass_initial: 0.1 # Initial percentage of cells occupied by grass
percent_shrub_initial: 0.1 # Initial percentage of cells occupied by shrubs
percent_tree_initial: 0.1 # Initial percentage of cells occupied by trees

## Precipitation:

# Dry Season
mean_storm_dry: 2.016 # Mean storm duration (hours)
mean_interstorm_dry: 159.36 # Mean interstorm duration (hours)
mean_storm_depth_dry: 3.07 # Mean storm depth (mm)

# Wet Season
mean_storm_wet: 1.896 # Mean storm duration (hours)
mean_interstorm_wet: 84.24 # Mean interstorm duration (hours)
mean_storm_depth_wet: 4.79 # Mean storm depth (mm)
doy_start_of_monsoon: 182 # Day of the year when the monsoon starts
doy_end_of_monsoon: 273 # Day of the year when the monsoon ends

## PotentialEvapotranspiration:
# Cosine Method
PET_method: Cosine
LT: 0 # Lag between peak TmaxF estimated by cosine method and solar forcing
(days)
DeltaD: 7. # Calibrated difference between
ND: 365. # Number of days in the year (days)
MeanTmaxF_grass: 5.15 # Mean annual rate of TmaxF (mm/d)
MeanTmaxF_shrub: 3.77 # Mean annual rate of TmaxF (mm/d)
MeanTmaxF_tree: 4.96 # Mean annual rate of TmaxF (mm/d)

# TmaxF - Estimated maximum evapotranspiration as a function of DOY
# using Penman Monteith method for historical weather

## Soil Moisture:

runon: 0. # Runon from higher elevations (mm)
f_bare: 0.7 # Fraction to partition PET for bare soil (None)
```



# Grass

VEGTYPE\_grass: 0 # Integer value to infer Vegetation Type  
intercept\_cap\_grass: 1. # Full canopy interception capacity (mm)  
zr\_grass: 0.3 # Root depth (m)  
I\_B\_grass: 20. # Infiltration capacity of bare soil (mm/h)  
I\_V\_grass: 24. # Infiltration capacity of vegetated soil (mm/h)  
pc\_grass: 0.43 # Soil porosity (None)  
fc\_grass: 0.56 # Soil saturation degree at field capacity (None)  
sc\_grass: 0.33 # Soil saturation degree at stomatal closure (None)  
wp\_grass: 0.13 # Soil saturation degree at wilting point (None)  
hgw\_grass: 0.1 # Soil saturation degree at hygroscopic point (None)  
beta\_grass: 13.8 # Deep percolation constant =  $2*b+4$  where b is water retention parameter

# Shrub

VEGTYPE\_shrub: 1 # Integer value to infer Vegetation Type  
intercept\_cap\_shrub: 1.5 # Full canopy interception capacity (mm)  
zr\_shrub: 0.5 # Root depth (m)  
I\_B\_shrub: 20. # Infiltration capacity of bare soil (mm/h)  
I\_V\_shrub: 40. # Infiltration capacity of vegetated soil (mm/h)  
pc\_shrub: 0.43 # Soil porosity (None)  
fc\_shrub: 0.56 # Soil saturation degree at field capacity (None)  
sc\_shrub: 0.24 # Soil saturation degree at stomatal closure (None)  
wp\_shrub: 0.13 # Soil saturation degree at wilting point (None)  
hgw\_shrub: 0.1 # Soil saturation degree at hygroscopic point (None)  
beta\_shrub: 13.8 # Deep percolation constant =  $2*b+4$  where b is water retention parameter

# Tree

VEGTYPE\_tree: 2 # Integer value to infer Vegetation Type  
intercept\_cap\_tree: 2. # Full canopy interception capacity (mm)  
zr\_tree: 1.3 # Root depth (m)  
I\_B\_tree: 20. # Infiltration capacity of bare soil (mm/h)  
I\_V\_tree: 40. # Infiltration capacity of vegetated soil (mm/h)  
pc\_tree: 0.43 # Soil porosity (None)  
fc\_tree: 0.56 # Soil saturation degree at field capacity (None)  
sc\_tree: 0.22 # Soil saturation degree at stomatal closure (None)  
wp\_tree: 0.15 # Soil saturation degree at wilting point (None)  
hgw\_tree: 0.1 # Soil saturation degree at hygroscopic point (None)  
beta\_tree: 13.8 # Deep percolation constant =  $2*b+4$  where b is water retention parameter

# Bare Soil

VEGTYPE\_bare: 3 # Integer value to infer Vegetation Type  
intercept\_cap\_bare: 1. # Full canopy interception capacity (mm)  
zr\_bare: 0.15 # Root depth (m)  
I\_B\_bare: 20. # Infiltration capacity of bare soil (mm/h)  
I\_V\_bare: 20. # Infiltration capacity of vegetated soil (mm/h)  
pc\_bare: 0.43 # Soil porosity (None)  
fc\_bare: 0.56 # Soil saturation degree at field capacity (None)  
sc\_bare: 0.33 # Soil saturation degree at stomatal closure (None)

wp\_bare: 0.13 # Soil saturation degree at wilting point (None)  
hgw\_bare: 0.1 # Soil saturation degree at hygroscopic point (None)  
beta\_bare: 13.8 # Deep percolation constant

## Vegetation Dynamics:

Blive\_init: 102.  
Bdead\_init: 450.  
PET\_growth\_threshold: 3.8 # PET threshold for growing season (mm/d)  
PET\_dormancy\_threshold: 6.8 # PET threshold for dormant season (mm/d)  
Tdmax: 10. # Constant for dead biomass loss adjustment (mm/d)  
w: 0.55 # Conversion factor of CO2 to dry biomass (Kg DM/Kg CO2)

# Grass

WUE\_grass: 0.01 # Water use efficiency KgCO2Kg-1H2O  
cb\_grass: 0.0047 # Specific leaf area for green/live biomass (m2 leaf g-1 DM)  
cd\_grass: 0.009 # Specific leaf area for dead biomass (m2 leaf g-1 DM)  
ksg\_grass: 0.012 # Senescence coefficient of green/live biomass (d-1)  
kdd\_grass: 0.013 # Decay coefficient of aboveground dead biomass (d-1)  
kws\_grass: 0.02 # Maximum drought induced foliage loss rate (d-1)  
LAI\_max\_grass: 2. # Maximum leaf area index (m2/m2)  
LAIR\_max\_grass: 2.88 # Reference leaf area index (m2/m2)

# Shrub

WUE\_shrub: 0.0025 # Water use efficiency KgCO2Kg-1H2O  
cb\_shrub: 0.004 # Specific leaf area for green/live biomass (m2 leaf g-1 DM)  
cd\_shrub: 0.01 # Specific leaf area for dead biomass (m2 leaf g-1 DM)  
ksg\_shrub: 0.002 # Senescence coefficient of green/live biomass (d-1)  
kdd\_shrub: 0.013 # Decay coefficient of aboveground dead biomass (d-1)  
kws\_shrub: 0.02 # Maximum drought induced foliage loss rate (d-1)  
LAI\_max\_shrub: 2. # Maximum leaf area index (m2/m2)  
LAIR\_max\_shrub: 2. # Reference leaf area index (m2/m2)

# Tree

WUE\_tree: 0.0045 # Water use efficiency KgCO2Kg-1H2O  
cb\_tree: 0.004 # Specific leaf area for green/live biomass (m2 leaf g-1 DM)  
cd\_tree: 0.01 # Specific leaf area for dead biomass (m2 leaf g-1 DM)  
ksg\_tree: 0.002 # Senescence coefficient of green/live biomass (d-1)  
kdd\_tree: 0.013 # Decay coefficient of aboveground dead biomass (d-1)  
kws\_tree: 0.01 # Maximum drought induced foliage loss rate (d-1)  
LAI\_max\_tree: 4. # Maximum leaf area index (m2/m2)  
LAIR\_max\_tree: 4. # Reference leaf area index (m2/m2)

# Bare

WUE\_bare: 0.01 # Water use efficiency KgCO2Kg-1H2O  
cb\_bare: 0.0047 # Specific leaf area for green/live biomass (m2 leaf g-1 DM)  
cd\_bare: 0.009 # Specific leaf area for dead biomass (m2 leaf g-1 DM)  
ksg\_bare: 0.012 # Senescence coefficient of green/live biomass (d-1)  
kdd\_bare: 0.013 # Decay coefficient of aboveground dead biomass (d-1)  
kws\_bare: 0.02 # Maximum drought induced foliage loss rate (d-1)  
LAI\_max\_bare: 0.01 # Maximum leaf area index (m2/m2)

LAIR\_max\_bare: 0.01 # Reference leaf area index (m2/m2)

## Cellular Automaton Vegetation:

# Grass

Pemaxg: 0.35 # Maximal establishment probability

ING: 2 # Parameter to define allelopathic effect on grass from cresotebush

ThetaGrass: 0.62 # Drought resistant threshold

PmbGrass: 0.05 # Background mortality probability

# Shrub

Pemaxsh: 0.2 # Maximal establishment probability

ThetaShrub: 0.78 # Drought resistant threshold

PmbShrub: 0.03 # Background mortality probability

tpmaxShrub: 600 # Maximum age (yr)

# Tree

Pemaxtr: 0.25 # Maximal establishment probability

ThetaTree: 0.72 # Drought resistant threshold

PmbTree: 0.01 # Background mortality probability

tpmaxTree: 350 # Maximum age (yr)

# ShrubSeedling

ThetaShrubSeedling: 0.64 # Drought resistant threshold

PmbShrubSeedling: 0.03 # Background mortality probability

tpmaxShrubSeedling: 18 # Maximum age (yr)

# TreeSeedling

ThetaTreeSeedling: 0.64 # Drought resistant threshold

PmbTreeSeedling: 0.03 # Background mortality probability

tpmaxTreeSeedling: 18 # Maximum age (yr)

## Script S6. Code to run an surface runoff model in Landlab.

```
1 from landlab.io import read_esri_ascii
2 from landlab.components import SinkFiller, OverlandFlow
3 (mg, z) = read_esri_ascii('Watershed_DEM.asc',
4                           name='topographic__elevation')
5 mg.set_watershed_boundary_condition(z)
6 sf = SinkFiller(mg, routing='D4', apply_slope=True, fill_slope=1.e-5)
7 sf.fill_pits()
8 of = OverlandFlow(mg, steep_slopes=True)
9 elapsed_time = 0.
10 storm_duration = 3600. # in seconds
11 model_run_time = 84600. # in seconds
12 starting_precip = 25. # in mm/h
13 while elapsed_time < model_run_time:
14     if elapsed_time < storm_duration:
15         of.rainfall_intensity = starting_precip * 2.7778e-7 # mm/h to m/s
16     else:
17         of.rainfall_intensity = 0.
18     of.run_one_step() # this component can select its own timestep
19     elapsed_time += of.dt
```
